# Supplementary material
Source: HighWire-hosted journal article supplement (https://www.jneurosci.org/highwire/filestream/599627/field_highwire_adjunct_files/5/Figure_S6.pdf)

# A GSH Alone

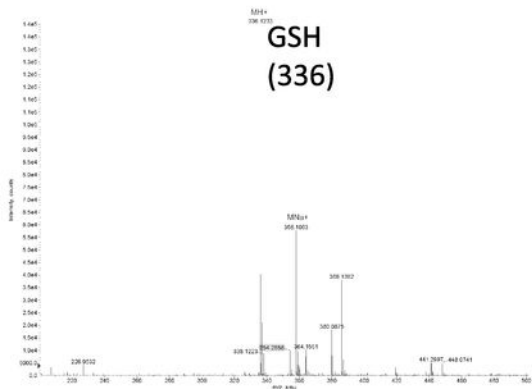

# B GSH + MO

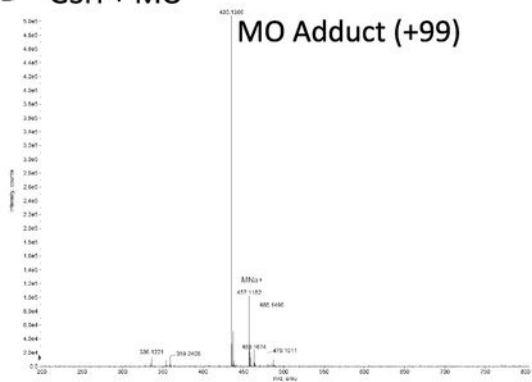

# C GSH + AP18

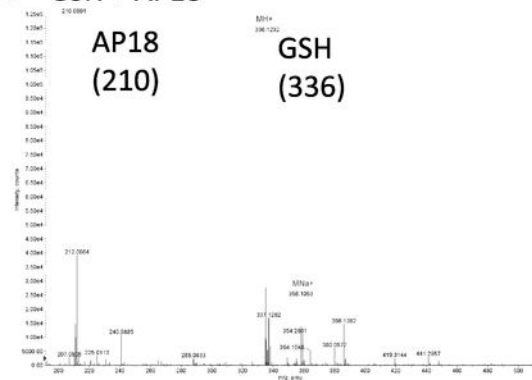

Supplement: Figure_S6.pdf [file Figure_S6.pdf]
